# Supplementary material for: Intelligent wireless power transfer via a 2-bit compact reconfigurable transmissive-metasurface-based router
Source: PubMed Central journal article supplement (PMC10984985; doi:10.1038/s41467-024-46984-4), 2024-04-01
Supplement: 41467_2024_46984_MOESM3_ESM.pdf [file 41467_2024_46984_MOESM3_ESM.pdf]

## **DESCRIPTION OF ADDITIONAL SUPPLEMENTARY FILES**

**Supplementary Movie 1** - Static Experimental Results of Power Delivery

**Supplementary Movie 2** - Dynamic Experimental Results of Power Delivery

**Supplementary Movie 3** - Dynamic Power Delivery to Multiple Targets #1

**Supplementary Movie 4** - Dynamic Power Delivery to Multiple Targets #2

**Supplementary Movie 5** - Power Delivery to a Moving Smartphone

**Supplementary Movie 6** - Power Delivery to a Moving Power Bank Movie

**Supplementary Movie 7** - Simultaneous Wireless Information and Power Transfer
